# Supplementary material for: Vitamin K1 and progression of cardiovascular calcifications in hemodialysis patients: the VitaVasK randomized controlled trial
Source: PubMed Central journal article supplement — Clin Kidney J. 2022 Aug 24;15(12):2300–11. doi: 10.1093/ckj/sfac184 (PMC9664584; doi:10.1093/ckj/sfac184), 2022-08-24
Supplement: sfac184_supplemental_file.pdf [file sfac184_supplemental_file.pdf]

## Supplementary Material

### Vitamin K1 and Progression of Cardiovascular Calcifications in Hemodialysis Patients: The VitaVasK Randomized Controlled Trial

*Turgay Saritas<sup>1A</sup>, Sebastian Reinartz<sup>2A</sup>, Thilo Krüger<sup>3</sup>, Markus Ketteler<sup>4</sup>, Orfeas Liangos<sup>5,6</sup>, Laura Labriola<sup>7</sup>, Peter Stenvinkel<sup>8</sup>, Christoph Kopp<sup>9</sup>, Ralf Westenfeld<sup>10</sup>, Pieter Evenepoel<sup>11</sup>, Robert Siepmann<sup>2</sup>, Stephanie Wied<sup>12</sup>, Ralf-Dieter Hilgers<sup>12B</sup>, Leon Schurgers<sup>13B</sup>, Jürgen Floege<sup>1B</sup> for the VitaVasK Investigators*

**Table S1:** VitaVasK Trial Synopsis.

**Table S2.** Calcification mass (in mg) at baseline of all participants included in the analysis of the VitaVasK study.

**Table S3:** Primary study endpoints: P-values yielded by the sensitivity analyses.

**Table S4.** Secondary endpoint thoracic aortic calcification Agatston score: changes in Agatston scores between baseline, 12 and 18 months in participants of the VitaVasK study.

**Table S5:** Secondary endpoint coronary artery calcification Agatston score: changes in Agatston scores between baseline, 12 and 18 months in participants of the VitaVasK study.

**Table S6:** Secondary endpoint aortic valve volume score: changes in volume scores (mm<sup>3</sup>) between baseline, 12 and 18 months in participants of the VitaVasK study.

**Table S7:** Secondary endpoint mitral valve volume score: changes in volume scores (mm<sup>3</sup>) between baseline, 12 and 18 months in participants of the VitaVasK study.

**Table S8.** Changes in Vitamin K and dp-ucMGP levels between baseline, 4 weeks, 12 and 18 months in participants of the VitaVasK study.

**Table S9:** Evolution of serum phosphate, intact parathyroid hormone and bone-specific alkaline phosphatase concentrations during the study period.

**Supplemental Figure S1:** Residual plots for the outcome parameter thoracic aortic calcification.

**Supplemental Figure S2:** Residual plots for the outcome parameter coronary artery calcification.

**Table S1: VitaVasK Trial Synopsis**

|                                |                                                                                                                                                                                                                                                                                                                                                                                                                                                                                                                                                                                                                                                              |
|--------------------------------|--------------------------------------------------------------------------------------------------------------------------------------------------------------------------------------------------------------------------------------------------------------------------------------------------------------------------------------------------------------------------------------------------------------------------------------------------------------------------------------------------------------------------------------------------------------------------------------------------------------------------------------------------------------|
| <b>Protocol Title</b>          | Vitamin K1 to slow vascular calcification in hemodialysis patients (VitaVasK)                                                                                                                                                                                                                                                                                                                                                                                                                                                                                                                                                                                |
| <b>Study Code</b>              | VitaVasK                                                                                                                                                                                                                                                                                                                                                                                                                                                                                                                                                                                                                                                     |
| <b>EudraCT No.</b>             | 2010-021264-14                                                                                                                                                                                                                                                                                                                                                                                                                                                                                                                                                                                                                                               |
| <b>Study No.</b>               | 10-003                                                                                                                                                                                                                                                                                                                                                                                                                                                                                                                                                                                                                                                       |
| <b>Principal Investigators</b> | <ul style="list-style-type: none"> <li>• Prof. Dr. Jürgen Floege, RWTH Aachen University Hospital, Germany</li> <li>• Dr. Christoph Kopp, University of Erlangen, Germany</li> <li>• Prof. Dr. Michel Jadoul, University of Brussels, Belgium</li> <li>• PD Dr. Orfeas Liangos, Clinical Center of Coburg, Germany</li> <li>• Prof. Dr. Peter Stenvinkel, Karolinska University Hospital, Stockholm, Sweden</li> <li>• PD Dr. Ralf Westenfeld, University of Düsseldorf, Germany</li> <li>• Prof. Dr. Pieter Evenepoel, UZ Leuven, Belgium</li> </ul>                                                                                                        |
| <b>Study Period</b>            | Recruitment Period: 6 years<br>Intervention Period: 18 months                                                                                                                                                                                                                                                                                                                                                                                                                                                                                                                                                                                                |
| <b>Phase</b>                   | III                                                                                                                                                                                                                                                                                                                                                                                                                                                                                                                                                                                                                                                          |
| <b>Objectives</b>              | The aim of the study is to show that a vitamin K1-based therapy attenuates the progression of thoracic aortic and coronary artery calcification compared to standard treatment                                                                                                                                                                                                                                                                                                                                                                                                                                                                               |
| <b>Study Design</b>            | Prospective, randomized, multicenter, multinational, controlled clinical trial using a two-arm parallel group design and 18-month treatment phase                                                                                                                                                                                                                                                                                                                                                                                                                                                                                                            |
| <b>Inclusion Criteria</b>      | <ul style="list-style-type: none"> <li>• Male or female <math>\geq 18</math> years of age</li> <li>• Not less than 6 months on hemodialysis</li> <li>• Cardiovascular calcification present (coronary artery volume score <math>&gt; 100</math>)</li> <li>• Written consent to take part in the study</li> <li>• Life expectancy not less than 18 months</li> </ul>                                                                                                                                                                                                                                                                                          |
| <b>Exclusion Criteria</b>      | <ul style="list-style-type: none"> <li>• Known hypersensitivity against vitamin K1</li> <li>• Intake of Vitamin K</li> <li>• History of thrombosis (except shunt occlusion)</li> <li>• Intake of vitamin K antagonists at baseline or in the 3 months prior to baseline</li> <li>• Inflammatory bowel disease</li> <li>• Short-bowel syndrome</li> <li>• Significant liver dysfunction</li> <li>• Any condition likely to impair vitamin K absorption (i.e. chronic pancreatitis)</li> <li>• Malignancy other than non-melanoma skin tumors</li> <li>• More than one stent in one coronary artery plus one or more stents in an additional artery</li> </ul> |

|                  |                                                                                                                                                                                                                                                                                                                                                                                                                                                                                                                                                                                                                                                                                                                                                                                                                                                                                                                                                                                                                                                                                                                                                                                                                                                                                                                                                                             |
|------------------|-----------------------------------------------------------------------------------------------------------------------------------------------------------------------------------------------------------------------------------------------------------------------------------------------------------------------------------------------------------------------------------------------------------------------------------------------------------------------------------------------------------------------------------------------------------------------------------------------------------------------------------------------------------------------------------------------------------------------------------------------------------------------------------------------------------------------------------------------------------------------------------------------------------------------------------------------------------------------------------------------------------------------------------------------------------------------------------------------------------------------------------------------------------------------------------------------------------------------------------------------------------------------------------------------------------------------------------------------------------------------------|
|                  | <ul style="list-style-type: none"> <li>• Hemoglobin &lt; 70 g/L</li> <li>• Pulse &gt; 100/min (resting heart rate)</li> <li>• Women who are pregnant or breastfeeding</li> <li>• Women without sufficient contraception</li> <li>• Alcohol or drug abuse</li> <li>• Mental condition rendering the subject unable to understand the nature, scope and possible consequences of the study</li> <li>• Subject unlikely to comply with protocol, e.g. uncooperative attitude, inability to return for follow-up visits and unlikelihood of completing the study</li> <li>• Participation in a parallel clinical trial or participation in another clinical trial within the previous 3 months</li> <li>• Subjects who are in any state of dependency to the sponsor or the investigators</li> <li>• Employees of the sponsor or the investigators</li> <li>• Subjects who have been committed to an institution by legal or regulatory order</li> </ul>                                                                                                                                                                                                                                                                                                                                                                                                                        |
| <b>Treatment</b> | <p>Arm 1: Standard treatment (usual care)<br/> Arm 2: Vitamin K1 (phylloquinone), thrice weekly p.o. (5 mg)</p>                                                                                                                                                                                                                                                                                                                                                                                                                                                                                                                                                                                                                                                                                                                                                                                                                                                                                                                                                                                                                                                                                                                                                                                                                                                             |
| <b>Efficacy</b>  | <p><u>Primary Endpoints:</u></p> <ol style="list-style-type: none"> <li>1. Progression of thoracic aortic calcification (absolute change in the volume score at the 18-month MSCT versus the baseline MSCT)</li> <li>2. Progression of coronary artery calcification (absolute change in the volume score at the 18-month MSCT versus the baseline MSCT)</li> </ol> <p><u>Secondary Endpoints:</u></p> <ol style="list-style-type: none"> <li>1. Progression of thoracic aortic calcification (absolute change in the Agatston score at the 18-month MSCT versus the baseline MSCT)</li> <li>2. Progression of coronary artery calcification (absolute change in the Agatston score at the 18-month MSCT versus the baseline MSCT)</li> <li>3. Progression of aortic valve calcification (absolute change in the Agatston and volume scores at the 18-month MSCT versus the baseline MSCT)</li> <li>4. Progression of mitral valve calcification (absolute change in the Agatston and volume scores at the 18-month MSCT versus the baseline MSCT)</li> <li>5. Mortality from any cause within 18 months after start of treatment</li> <li>6. Major adverse cardiovascular events: myocardial infarction, stroke, acute coronary syndrome, embolism, symptom-driven revascularization, death from cardiovascular cause within 18 months after start of treatment</li> </ol> |
| <b>Safety</b>    | <p>Clinical and laboratory safety variables include:</p>                                                                                                                                                                                                                                                                                                                                                                                                                                                                                                                                                                                                                                                                                                                                                                                                                                                                                                                                                                                                                                                                                                                                                                                                                                                                                                                    |

- |  |                                                                                                                                                                                                                                                                                                                      |
|--|----------------------------------------------------------------------------------------------------------------------------------------------------------------------------------------------------------------------------------------------------------------------------------------------------------------------|
|  | <ul style="list-style-type: none"><li>• History and physical examination</li><li>• Frequency, type, severity and duration of adverse events</li><li>• Assessment of laboratory parameters (sodium, potassium, calcium, phosphate, glucose, pH, triglycerides, AST, ALT, iPTH, 25-OH vitamin D<sub>3</sub>)</li></ul> |
|--|----------------------------------------------------------------------------------------------------------------------------------------------------------------------------------------------------------------------------------------------------------------------------------------------------------------------|

**Table S2.** Calcification mass (in mg) at baseline of all participants included in the analysis of the VitaVask study.

| <b>Calcification mass (mg)</b>          | <b>Control<br/>(N = 23)</b> | <b>Vitamin K1<br/>(N = 17)</b> |
|-----------------------------------------|-----------------------------|--------------------------------|
| Thoracic aorta calcification mass (mg)  | 1444.5 ± 1419.7             | 1218.8 ± 3091.8                |
| Coronary artery calcification mass (mg) | 334.1 ± 255.7               | 317.8 ± 266.7                  |
| Aortic valve calcification mass (mg)    | 31.1 ± 53.2                 | 25 ± 32.2                      |
| Mitral valve calcification mass (mg)    | 317 ± 722.7                 | 347.4 ± 684.4                  |

Values are expressed as mean values ± standard deviation.

**Table S3:** Primary study endpoints: P-values yielded by the sensitivity analyses.

| <b>Progression of thoracic aortic calcification volume score</b> |                |                |                |
|------------------------------------------------------------------|----------------|----------------|----------------|
| <b>Parameter:</b>                                                | <b>Model 1</b> | <b>Model 2</b> | <b>Model 3</b> |
| <b>Time</b>                                                      | <.0001         | <.0001         | <.0001         |
| <b>Group</b>                                                     | 0.1228         | 0.2296         | 0.0664         |
| <b>Time &amp; group</b>                                          | 0.0850         | 0.0903         | 0.0966         |
| <b>Center</b>                                                    | 0.5678         | 0.0689         | 0.5806         |
| <b>Gender</b>                                                    | .              | 0.3601         | 0.3746         |
| <b>Age</b>                                                       | .              | 0.0186         | 0.0123         |
| <b>Smoker</b>                                                    | .              | .              | 0.3045         |
| <b>Diabetes mellitus</b>                                         | .              | .              | 0.1335         |
| <b>Progression of coronary artery calcification volume score</b> |                |                |                |
| <b>Parameter:</b>                                                | <b>Model 1</b> | <b>Model 2</b> | <b>Model 3</b> |
| <b>Time</b>                                                      | 0.0025         | 0.0034         | 0.0054         |
| <b>Group</b>                                                     | 0.1457         | 0.3183         | 0.3952         |
| <b>Time &amp; group</b>                                          | 0.1913         | 0.2067         | 0.2564         |
| <b>Center</b>                                                    | 0.5279         | 0.5784         | 0.7678         |
| <b>Gender</b>                                                    | .              | 0.5202         | 0.8483         |
| <b>Age</b>                                                       | .              | 0.8196         | 0.6795         |
| <b>Smoker</b>                                                    | .              | .              | 0.0365         |
| <b>Diabetes mellitus</b>                                         | .              | .              | 0.0241         |

Model 1: adjusted for center. Model 2: adjusted for center, gender and age. Model 3: adjusted for center, gender, age, smoking status and diabetes mellitus.

**Table S4. Secondary endpoint thoracic aortic calcification Agatston score: changes in Agatston scores between baseline, 12 and 18 months in participants of the VitaVask study**

|                                                                 |                               | <b>Model 1</b>            | <b>Model 2</b>            | <b>Model 3</b>            |
|-----------------------------------------------------------------|-------------------------------|---------------------------|---------------------------|---------------------------|
| <b>Changes in Agatston score versus baseline within groups</b>  |                               |                           |                           |                           |
| <b>Vitamin K</b>                                                | <b>Baseline vs. 12 months</b> | 601.0 (334.3),<br>0.0774  | 578.6 (343.6),<br>0.0976  | 578.3 (344.3),<br>0.0987  |
|                                                                 | <b>Baseline vs. 18 months</b> | 885.5 (420.5),<br>0.0396  | 853.7 (438.7),<br>0.0566  | 859.9 (439.5),<br>0.0555  |
| <b>Control</b>                                                  | <b>Baseline vs. 12 months</b> | 1102.7 (279.3),<br>0.0002 | 1101.9 (281.3),<br>0.0002 | 1082.7 (295.8),<br>0.0006 |
|                                                                 | <b>Baseline vs. 18 months</b> | 2051.6 (356.7),<br><.0001 | 2058.5 (358.9),<br><.0001 | 2035.8 (368.9),<br><.0001 |
| <b>Changes in Agatston score versus baseline between groups</b> |                               |                           |                           |                           |
| <b>Vitamin K vs. control</b>                                    | <b>Baseline vs. 12 months</b> | 501.7 (435.6),<br>0.2542  | 523.3 (444.0),<br>0.2435  | 504.4 (453.9),<br>0.2713  |
|                                                                 | <b>Baseline vs. 18 months</b> | 1166.1 (551.4),<br>0.0388 | 1204.7 (566.8),<br>0.0379 | 1175.9 (573.8),<br>0.0452 |

Data are linear mixed model estimates (standard error, SE) and p-value.

Model 1: adjusted for center. Model 2: adjusted for center, gender and age. Model 3: adjusted for center, gender, age, smoking status and diabetes mellitus.

**Progression of thoracic aortic calcification Agatston score.** P-values yielded by the sensitivity analyses.

| <b>Parameter:</b>        | <b>Model 1</b> | <b>Model 2</b> | <b>Model 3</b> |
|--------------------------|----------------|----------------|----------------|
| <b>Time</b>              | <.0001         | <.0001         | <.0001         |
| <b>Group</b>             | 0.1122         | 0.2095         | 0.0566         |
| <b>Time &amp; group</b>  | 0.0993         | 0.0975         | 0.1107         |
| <b>Center</b>            | 0.5751         | 0.0676         | 0.5701         |
| <b>Gender</b>            | .              | 0.3355         | 0.3496         |
| <b>Age</b>               | .              | 0.0196         | 0.0124         |
| <b>Smoker</b>            | .              | .              | 0.2846         |
| <b>Diabetes mellitus</b> | .              | .              | 0.1219         |

Model 1: adjusted for center. Model 2: adjusted for center, gender and age. Model 3: adjusted for center, gender, age, smoking status and diabetes mellitus.

**Table S5: Secondary endpoint coronary artery calcification Agatston score: changes in Agatston scores between baseline, 12 and 18 months in participants of the VitaVask study.**

|                                                                 |                               | <b>Model 1</b>           | <b>Model 2</b>           | <b>Model 3</b>           |
|-----------------------------------------------------------------|-------------------------------|--------------------------|--------------------------|--------------------------|
| <b>Changes in Agatston score versus baseline within groups</b>  |                               |                          |                          |                          |
| <b>Vitamin K</b>                                                | <b>Baseline vs. 12 months</b> | 210.1 (154.2),<br>0.1783 | 209.9 (158.3),<br>0.1899 | 209.5 (159.3),<br>0.1938 |
|                                                                 | <b>Baseline vs. 18 months</b> | 224.9 (189.5),<br>0.2398 | 225.2 (197.7),<br>0.2592 | 228.6 (198.5),<br>0.2543 |
| <b>Control</b>                                                  | <b>Baseline vs. 12 months</b> | 502.6 (129.9),<br>0.0003 | 502.6 (130.9),<br>0.0003 | 473.0 (138.1),<br>0.0011 |
|                                                                 | <b>Baseline vs. 18 months</b> | 790.8 (166.1),<br><.0001 | 791.3 (167.5),<br><.0001 | 764.6 (172.6),<br><.0001 |
| <b>Changes in Agatston score versus baseline between groups</b> |                               |                          |                          |                          |
| <b>Vitamin K vs control</b>                                     | <b>Baseline vs. 12 months</b> | 292.5 (201.6),<br>0.1521 | 292.6 (205.4),<br>0.1596 | 263.5 (210.8),<br>0.2165 |
|                                                                 | <b>Baseline vs. 18 months</b> | 565.8 (252.0),<br>0.0284 | 566.1 (259.1),<br>0.0329 | 536.0 (263.0),<br>0.0462 |

Data are linear mixed model estimates (standard error, SE) and p-value.

Model 1: adjusted for center. Model 2: adjusted for center, gender and age. Model 3: adjusted for center, gender, age, smoking status and diabetes mellitus.

**Progression of coronary artery calcification Agatston score.** P-values yielded by the sensitivity analyses.

| <b>Parameter:</b>        | <b>Model 1</b> | <b>Model 2</b> | <b>Model 3</b> |
|--------------------------|----------------|----------------|----------------|
| <b>Time</b>              | 0.0006         | 0.0008         | 0.0014         |
| <b>Group</b>             | 0.1554         | 0.3292         | 0.3688         |
| <b>Time &amp; group</b>  | 0.0863         | 0.0978         | 0.1266         |
| <b>Center</b>            | 0.5898         | 0.6469         | 0.8037         |
| <b>Gender</b>            | .              | 0.4858         | 0.8424         |
| <b>Age</b>               | .              | 0.7619         | 0.7482         |
| <b>Smoker</b>            | .              | .              | 0.0321         |
| <b>Diabetes mellitus</b> | .              | .              | 0.0291         |

Model 1: adjusted for center. Model 2: adjusted for center, gender and age. Model 3: adjusted for center, gender, age, smoking status and diabetes mellitus.



**Table S6: Secondary endpoint aortic valve volume score: changes in volume scores (mm<sup>3</sup>) between baseline, 12 and 18 months in participants of the VitaVask study.**

|                                                               |                               | <b>Model 1</b>      | <b>Model 2</b>      | <b>Model 3</b>      |
|---------------------------------------------------------------|-------------------------------|---------------------|---------------------|---------------------|
| <b>Changes in volume score versus baseline within groups</b>  |                               |                     |                     |                     |
| <b>Vitamin K</b>                                              | <b>Baseline vs. 12 months</b> | 5.2 (15.2), 0.7325  | 4.4 (15.6), 0.7785  | 4.4 (14.7), 0.7630  |
|                                                               | <b>Baseline vs. 18 months</b> | 19.0 (18.5), 0.3107 | 17.7 (19.3), 0.3648 | 17.3 (18.1), 0.3431 |
| <b>Control</b>                                                | <b>Baseline vs. 12 months</b> | 19.5 (12.4), 0.1208 | 19.5 (12.5), 0.1236 | 28.9 (12.3), 0.0224 |
|                                                               | <b>Baseline vs. 18 months</b> | 55.1 (15.9), 0.0010 | 55.0 (16.1), 0.0011 | 64.5 (15.5), 0.0001 |
| <b>Changes in volume score versus baseline between groups</b> |                               |                     |                     |                     |
| <b>Vitamin K vs control</b>                                   | <b>Baseline vs. 12 months</b> | 14.3 (19.6), 0.4690 | 15.1 (20.0), 0.4531 | 24.4 (19.1), 0.2070 |
|                                                               | <b>Baseline vs. 18 months</b> | 36.1 (24.4), 0.1446 | 37.4 (25.1), 0.1424 | 47.2 (23.8), 0.0527 |

Data are linear mixed model estimates (standard error, SE) and p-value.

Model 1: adjusted for center. Model 2: adjusted for center, gender and age. Model 3: adjusted for center, gender, age, smoking status and diabetes mellitus.

**Progression of aortic valve volume score. P-values yielded by the sensitivity analyses.**

| <b>Parameter:</b>        | <b>Model 1*</b> | <b>Model 2 **</b> | <b>Model 3 ***</b> |
|--------------------------|-----------------|-------------------|--------------------|
| <b>Time</b>              | 0.0059          | 0.0084            | 0.0025             |
| <b>Group</b>             | 0.4696          | 0.3172            | 0.8730             |
| <b>Time &amp; group</b>  | 0.2982          | 0.2960            | 0.1439             |
| <b>Center</b>            | 0.5443          | 0.4226            | 0.0958             |
| <b>Gender</b>            | .               | 0.3948            | 0.6272             |
| <b>Age</b>               | .               | 0.3009            | 0.1137             |
| <b>Smoker</b>            | .               | .                 | 0.2237             |
| <b>Diabetes mellitus</b> | .               | .                 | 0.3243             |

Model 1: adjusted for center. Model 2: adjusted for center, gender and age. Model 3: adjusted for center, gender, age, smoking status and diabetes mellitus.

**Table S7: Secondary endpoint mitral valve volume score: changes in volume scores (mm<sup>3</sup>) between baseline, 12 and 18 months in participants of the VitaVask study.**

|                                                               |                               | <b>Model 1</b>       | <b>Model 2</b>       | <b>Model 3</b>       |
|---------------------------------------------------------------|-------------------------------|----------------------|----------------------|----------------------|
| <b>Changes in volume score versus baseline within groups</b>  |                               |                      |                      |                      |
| <b>Vitamin K</b>                                              | <b>Baseline vs. 12 months</b> | 80.9 (71.6), 0.2630  | 87.4 (73.4), 0.2387  | 87.5 (73.5), 0.2389  |
|                                                               | <b>Baseline vs. 18 months</b> | 159.1 (88.8), 0.0784 | 170.6 (92.4), 0.0700 | 170.0 (92.5), 0.0714 |
| <b>Control</b>                                                | <b>Baseline vs. 12 months</b> | 160.5 (63.2), 0.0138 | 160.4 (63.6), 0.0145 | 146.7 (65.3), 0.0287 |
|                                                               | <b>Baseline vs. 18 months</b> | 258.4 (79.9), 0.0020 | 259.6 (80.4), 0.0021 | 247.0 (81.6), 0.0037 |
| <b>Changes in volume score versus baseline between groups</b> |                               |                      |                      |                      |
| <b>Vitamin K vs control</b>                                   | <b>Baseline vs. 12 months</b> | 79.6 (95.5), 0.4079  | 73.1 (97.1), 0.4551  | 59.3 (98.3), 0.5490  |
|                                                               | <b>Baseline vs. 18 months</b> | 99.3 (119.4), 0.4089 | 89.0 (122.5), 0.4704 | 77.1 (123.4), 0.5347 |

Data are linear mixed model estimates (standard error, SE) and p-value.

Model 1: adjusted for center. Model 2: adjusted for center, gender and age. Model 3: adjusted for center, gender, age, smoking status and diabetes mellitus.

**Progression of mitral valve volume score. P-values yielded by the sensitivity analyses.**

| <b>Parameter:</b>        | <b>Model 1*</b> | <b>Model 2 **</b> | <b>Model 3 ***</b> |
|--------------------------|-----------------|-------------------|--------------------|
| <b>Time</b>              | 0.0039          | 0.0037            | 0.0054             |
| <b>Group</b>             | 0.7810          | 0.4245            | 0.3456             |
| <b>Time &amp; group</b>  | 0.6731          | 0.7318            | 0.8065             |
| <b>Center</b>            | 0.6488          | 0.0652            | 0.7818             |
| <b>Gender</b>            | .               | 0.5533            | 0.7484             |
| <b>Age</b>               | .               | 0.3665            | 0.2293             |
| <b>Smoker</b>            | .               | .                 | 0.1697             |
| <b>Diabetes mellitus</b> | .               | .                 | 0.3883             |

Model 1: adjusted for center. Model 2: adjusted for center, gender and age. Model 3: adjusted for center, gender, age, smoking status and diabetes mellitus.

**Table S8. Changes in Vitamin K and dp-ucMGP levels between baseline, 4 weeks, 12 and 18 months in participants of the VitaVask study.**

| Groups                                                  | Time points           | Vitamin K level                          | Dp-ucMGP level         |
|---------------------------------------------------------|-----------------------|------------------------------------------|------------------------|
|                                                         |                       | Parameter estimates (standard error, SE) |                        |
| Vitamin K                                               | Baseline              | 0.8 (0.4)                                | 1574.8 (112.7)         |
|                                                         | 4 weeks               | 3.9 (0.4)                                | 574.3 (114.9)          |
|                                                         | 12 months             | 3.2 (0.5)                                | 534.2 (152.4)          |
|                                                         | 18 months             | 5.3 (0.6)                                | 487.4 (185.1)          |
| Control                                                 | Baseline              | 0.8 (0.3)                                | 1448.0 (115.6)         |
|                                                         | 4 weeks               | 0.6 (0.3)                                | 1579.9 (109.2)         |
|                                                         | 12 months             | 0.5 (0.3)                                | 1673.4 (110.1)         |
|                                                         | 18 months             | 0.7 (0.4)                                | 1472.3 (139.8)         |
| <b>Changes in levels versus baseline between groups</b> |                       |                                          |                        |
| Groups                                                  | Time points           | Vitamin K level                          | Dp-ucMGP level         |
| Vitamin K vs control                                    | Baseline to 4 weeks   | -3.2 (0.5), <.0001                       | 1132.4 (173.9), <.0001 |
|                                                         | Baseline to 12 months | -2.6 (0.8), 0.0006                       | 1265.9 (233.6), <.0001 |
|                                                         | Baseline to 18 months | -4.6 (0.9), <.0001                       | 1111.7 (265.6), <.0001 |

Data are linear mixed model estimates (standard error, SE) and p-values. The model was adjusted for center.

**Table S9: Evolution of serum phosphate, intact parathyroid hormone and bone-specific alkaline phosphatase concentrations during the study period.**

| Parameter                                     | Time Point | Control group | Vitamin K1 group |
|-----------------------------------------------|------------|---------------|------------------|
| Serum phosphate, mmol/L                       | Baseline   | 1.8 ± 0.5     | 1.9 ± 1.2        |
|                                               | 12 months  | 1.7 ± 0.6     | 1.6 ± 0.5        |
|                                               | 18 months  | 1.6 ± 0.5     | 1.6 ± 0.4        |
| Serum-intact parathyroid hormone, ng/L        | Baseline   | 265 ± 307     | 536 ± 427        |
|                                               | 12 months  | 246 ± 208     | 263 ± 314        |
|                                               | 18 months  | 204 ± 141     | 520 ± 307        |
| Serum bone-specific alkaline phosphatase, U/I | Baseline   | 27 ± 23       | 36 ± 33          |
|                                               | 12 months  | 24 ± 16       | 35 ± 40          |
|                                               | 18 months  | 20 ± 11       | 28 ± 29          |

Data are means ± SD.

Normal values for serum phosphate range from 0.81 to 1.45 mmol/L, for serum-intact parathyroid hormone range from 15 to 65 ng/L, and for serum bone-specific alkaline phosphatase range from 15 to 42 U/I.

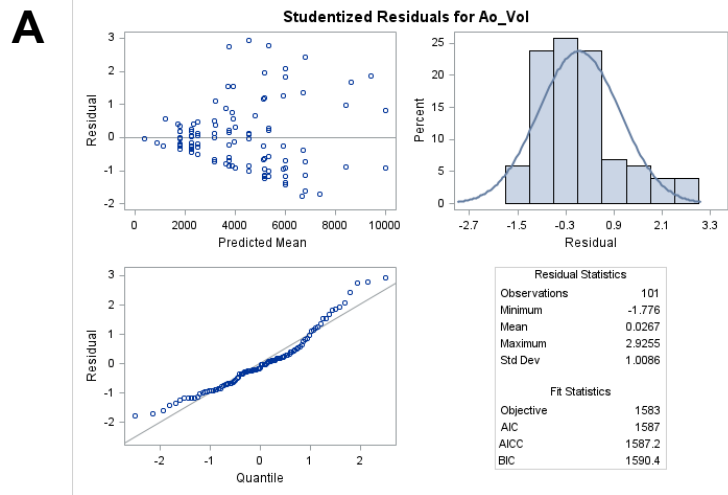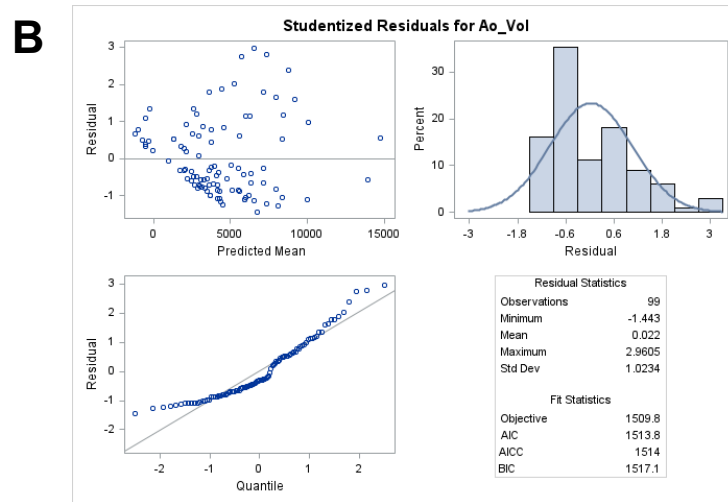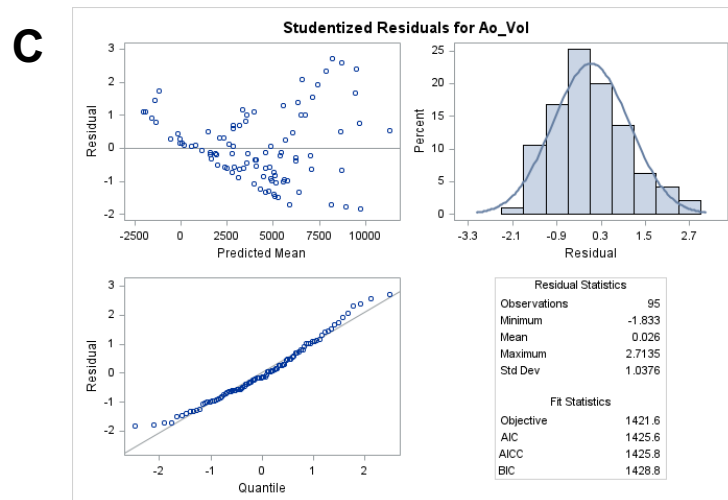

Supplemental Figure S1: Residual plots for the outcome parameter thoracic aortic calcification. A: adjusted for center. B: adjusted for center, gender and age. C: adjusted for center, gender, age, smoking status and diabetes mellitus.

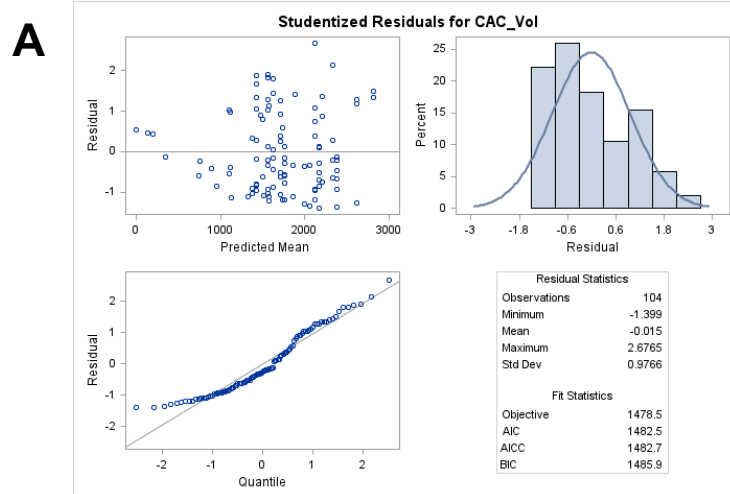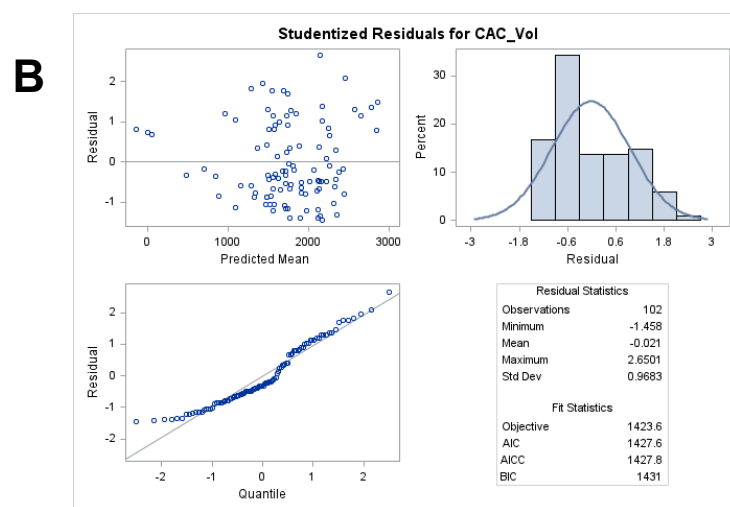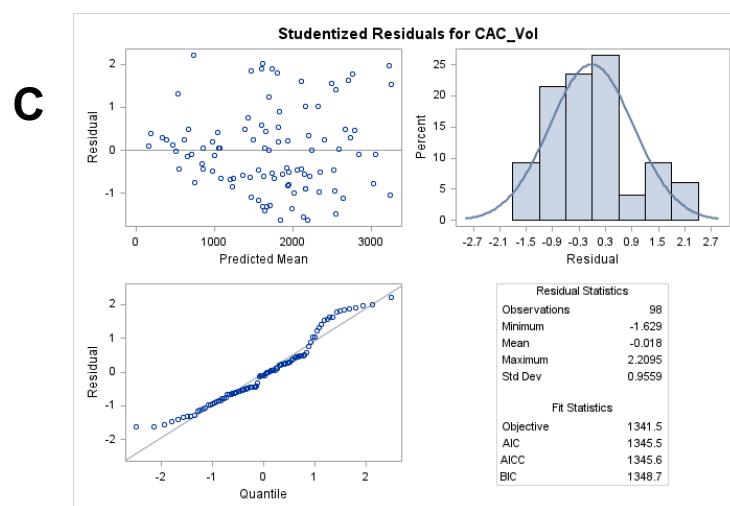

Supplemental Figure S2: Residual plots for the outcome parameter coronary artery calcification. A: adjusted for center. B: adjusted for center, gender and age. C: adjusted for center, gender, age, smoking status and diabetes mellitus.
